# Supplementary material for: Paper-based flexible strain and pressure sensor with enhanced mechanical strength and super-hydrophobicity that can work under water
Source: Royal Society of Chemistry journal article supplement (doi:10.1039/d1tc04697g), 2022-01-01
Supplement: d1tc04697g1.pdf [file d1tc04697g1.pdf]

## 1 *Supporting Information*

### 2 **Paper-based Flexible Strain and Pressure Sensor with Enhanced Mechanical** 3 **Strength and Super-hydrophobicity that can Work Under Water**

4 Hanbin Liu<sup>a\*</sup>, Wei Wang<sup>a</sup>, Huacui Xiang<sup>a</sup>, Haiwei Wu<sup>a</sup>, Zhijian Li<sup>a</sup>, Hongwei Zhou<sup>b</sup>,  
5 Wei Huang<sup>c\*</sup>

6 <sup>a</sup> Shaanxi Provincial Key Laboratory of Papermaking Technology and Specialty Paper Development,  
7 College of Bioresource Chemical and Materials Engineering, Shaanxi University of Science &  
8 Technology, Xi'an, P.R. China (710021)

9 <sup>b</sup> School of Materials and Chemical Engineering, Xi'an Technological University, Xi'an, P. R. China  
10 (710021)

11 <sup>c</sup> Frontiers Science Center for Flexible Electronics, Xi'an Institute of Flexible Electronics (IFE),  
12 Northwestern Polytechnical University, Xi'an, China (710072)

13

14 \* H. Liu: liuhanbin@sust.edu.cn; hanbin\_liu@foxmail.com.

15 W. Huang: iamwhuang@nwpu.edu.cn

16

17 **Table S1.** Comparisons of the reported various paper-based sensors with this work.

18 **Figure S1.** Structure diagram of the paper-based sensor for strain and pressure  
19 detection.

20 **Figure S2.** SEM images of (a) graphite nanoplates and (b) graphite powders.

21 **Figure S3.** FESEM images of graphite nanoplates.

22 **Figure S4.** AFM image of graphite nanoplates with corresponding height profile.

23 **Figure S5.** 3D images of the composite paper (a) before and (b) after coating AKD.

24 **Figure S6.** Schematic model for calculation of the strain under bending. The sagitta  
25 was measured before the calculation.

26 **Figure S7.** Illustration of the sensor under strain with different content of graphite  
27 nanoplates.

28 **Figure S8.** SEM images of the composite paper with graphite nanoplates content of (a,  
29 d) 15 wt%, (b, e) 22 wt% and (c, f) 30 wt%.

30 **Figure S9.** a) Stress-strain curves of the composite paper with different content of  
31 graphite nanoplates. b) Stress-strain curves of the composite paper with different  
32 content of CNF.

33 **Figure S10.** (a) Resistance change ratio under various bending strains of the paper-  
34 based sensor with different coating times of AKD, and (b) the corresponding GF. Cross-  
35 section SEM images of the composite paper (c) before and (d) after coating AKD.

36 **Figure S11.** The water contact angle of the composite paper with different graphite  
37 nanoplates content after two times of AKD coating.

38 **Figure S12.** Stress-strain curves of the composite paper with and without coating AKD.

39 **Figure S13.** Resistance change ratio as function of the bending strain applied in normal  
40 circumstance (RH=27%), in high humidity (RH=80%) and under water.

41 **Figure S14.** Illustration of the testing setup of the sensor for 1000 bending-unbending  
42 cycles under water.



44 **Table S1.** Comparisons of the reported various paper-based strain sensors with this work.

| Conductive materials    | Main methods         | Response time (s) | Gauge factor  | Super-hydrophobicity | Work under Water | encapsulation | Publication year | Reference |
|-------------------------|----------------------|-------------------|---------------|----------------------|------------------|---------------|------------------|-----------|
| Graphite                | pencil drawn         | 0.11              | 536.6         | no                   | Not mentioned    | Not mentioned | 2015             | 1         |
| AgNWs/LDHs              | screen printing      | 0.12              | Not mentioned | no                   | Not mentioned    | Not mentioned | 2015             | 2         |
| Graphite                | meyer-rod coating    | 0.0196            | 804.9         | no                   | Not mentioned    | Not mentioned | 2016             | 3         |
| CB                      | dip-coating          | 0.24              | 4.3           | no                   | Not mentioned    | Not mentioned | 2017             | 4         |
| rGO                     | drop-casting         | Not mentioned     | 66.6          | no                   | Not mentioned    | Not mentioned | 2017             | 5         |
| CB                      | screen-printing      | 0.000625          | 647           | no                   | Not mentioned    | Not mentioned | 2017             | 6         |
| Graphite/CB             | papermaking          | 0.36              | 27            | no                   | Not mentioned    | Not mentioned | 2018             | 7         |
| ITO NPs                 | hand-painting        | Not mentioned     | 41.98         | no                   | Not mentioned    | Not mentioned | 2019             | 8         |
| CB/rGO                  | spraying             | 0.13              | 14.6          | no                   | Not mentioned    | Not mentioned | 2019             | 9         |
| HPM                     | brush coating        | 0.24              | 19.1          | no                   | Not mentioned    | Not mentioned | 2020             | 10        |
| MCG                     | direct-laser writing | 0.166             | 73            | no                   | Not mentioned    | Not mentioned | 2020             | 11        |
| Graphene                | meyer-rod coating    | Not mentioned     | 3.82          | no                   | Not mentioned    | Not mentioned | 2020             | 12        |
| Ag nanowires            | papermaking          | Not mentioned     | 10.2          | no                   | Not mentioned    | Not mentioned | 2020             | 13        |
| MoS <sub>2</sub> Pencil | hand writing         | Not mentioned     | 13            | no                   | Not mentioned    | Not mentioned | 2021             | 14        |
| CB/CNT                  | dip-coating          | Not mentioned     | 7.5           | yes                  | Not mentioned    | Not mentioned | 2019             | 15        |
| Carbon ink              | soaking-drying       | 0.34              | Not mentioned | yes                  | Not mentioned    | Not mentioned | 2021             | 16        |
| Ag/MWCNTs               | sputter coating      | 0.078             | 263.34        | no                   | yes              | yes           | 2021             | 17        |
| Graphite nanoplates     | papermaking          | 0.3               | 18.99         | yes                  | yes              | Not mentioned | -                | this work |

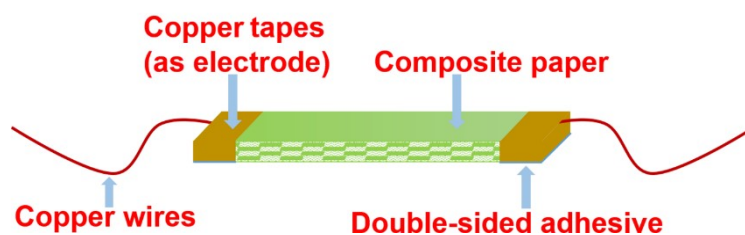

46  
47 **Figure S1.** Structure diagram of the paper-based sensor for strain and pressure  
48 detection.  
49

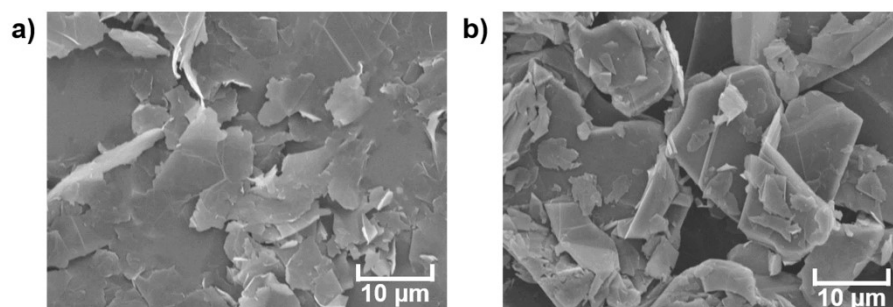

50  
51 **Figure S2.** SEM images of (a) graphite nanoplates and (b) graphite powders.  
52

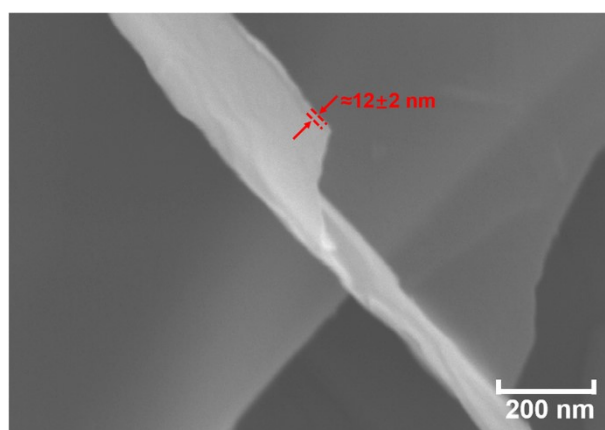

53  
54 **Figure S3.** FESEM images of graphite nanoplates  
55

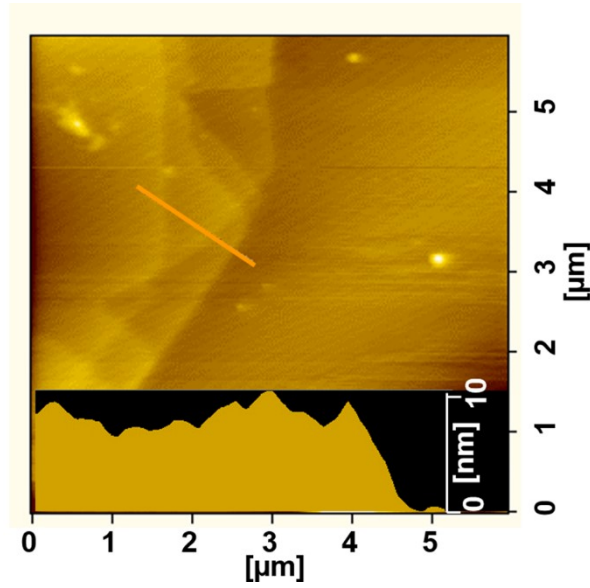

**Figure S4.** AFM image of graphite nanoplates with corresponding height profile.

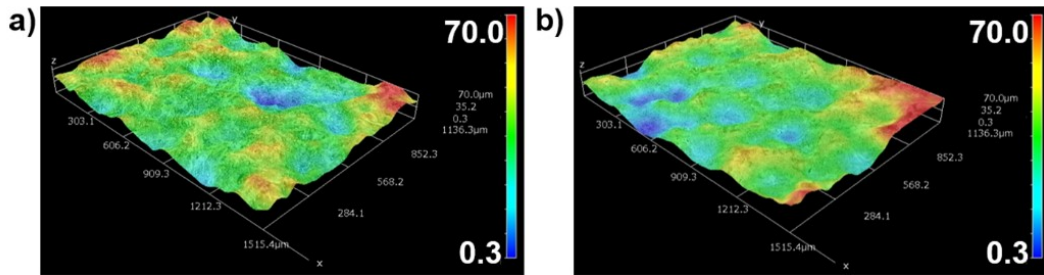

**Figure S5.** 3D images of the composite paper (a) before and (b) after coating AKD.

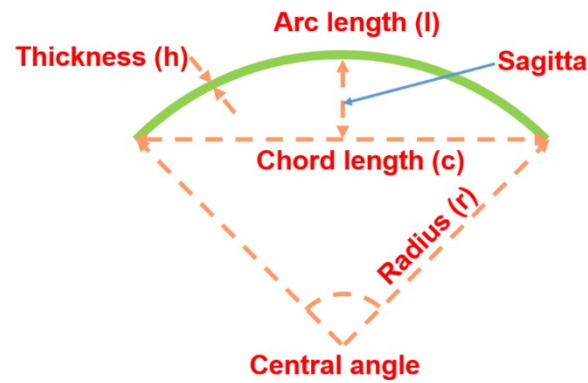

**Figure S6.** Schematic model for calculation of the strain under bending. The sagitta was measured before the calculation.

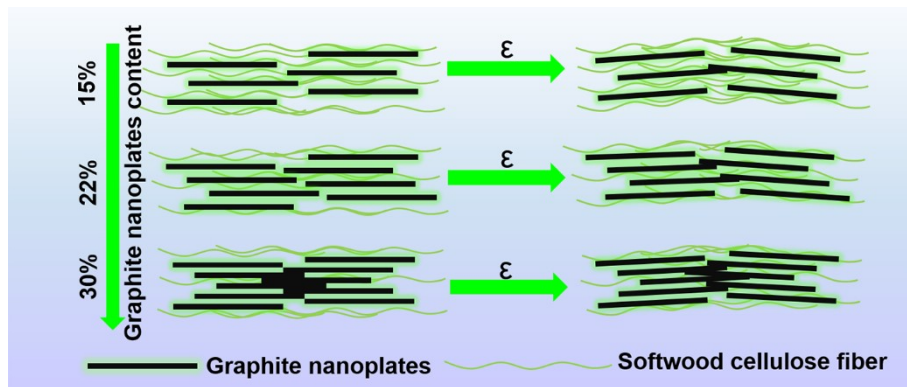

65  
66 **Figure S7.** Illustration of the sensor under strain with different content of graphite  
67 nanoplates.  
68

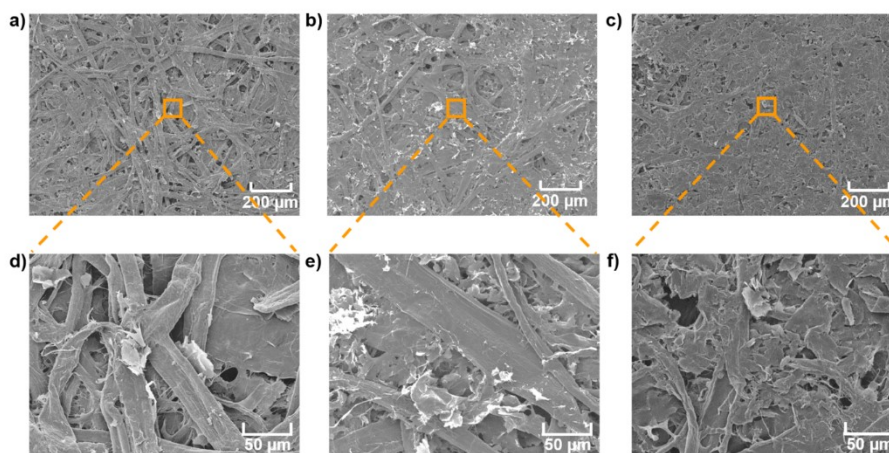

69  
70 **Figure S8.** SEM images of the composite paper with graphite nanoplates content of (a,  
71 d) 15 wt%, (b, e) 22 wt% and (c, f) 30 wt%.  
72  
73  
74  
75

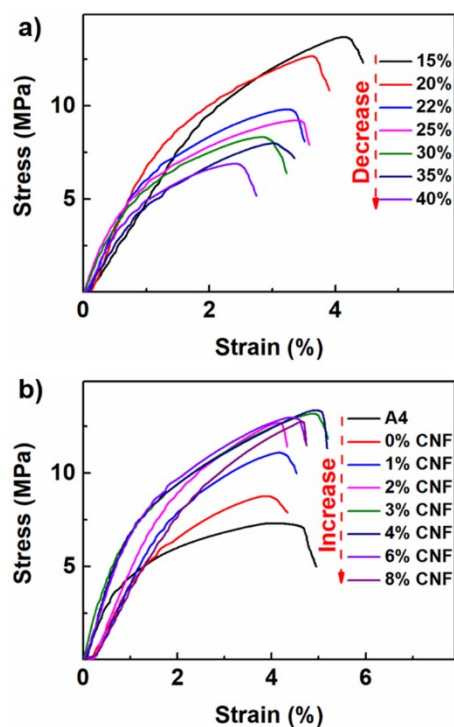

76  
77 **Figure S9.** a) Stress-strain curves of the composite paper with different content of  
78 graphite nanoplates. b) Stress-strain curves of the composite paper with different  
79 content of CNF.

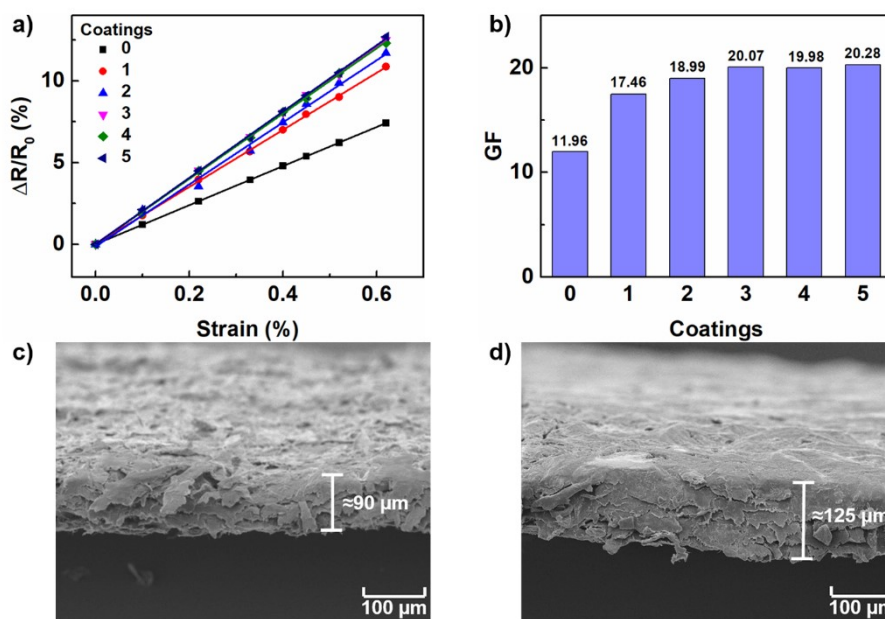

81  
82 **Figure S10.** (a) Resistance change ratio ( $\Delta R/R_0$ ) under various bending strains ( $\epsilon$ ) of  
83 the paper-based sensor with different coating times of AKD, and (b) the corresponding  
84 GF. Cross-section SEM images of the composite paper (c) before and (d) after coating  
85 AKD.

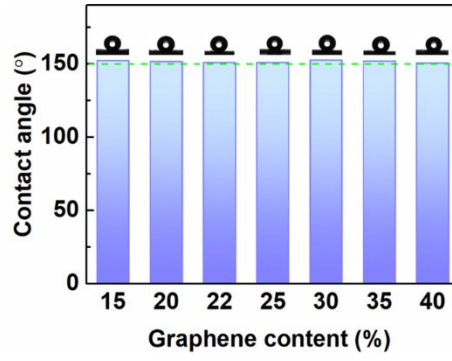

87

88 **Figure S11.** The water contact angle of the composite paper with different graphite  
 89 nanoplates content after two times of AKD coating.

90

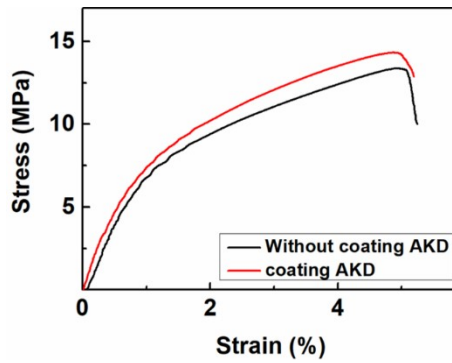

91

92 **Figure S12.** Stress-strain curves of the composite paper with and without coating AKD.

93

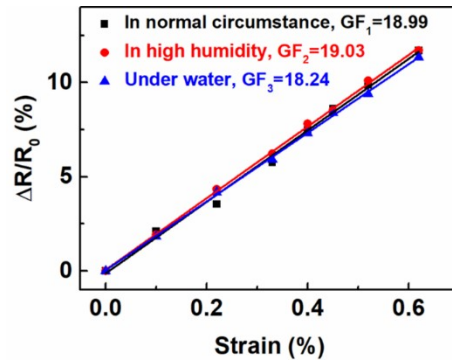

94

95 **Figure S13.** Resistance change ratio as function of the bending strain applied in normal  
 96 circumstance (RH=27%), in high humidity (RH=80%) and under water.

97

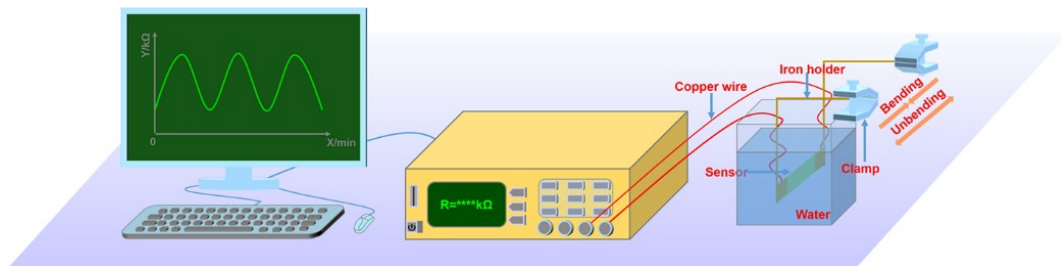

98

99 **Figure S14.** Illustration of the testing setup of the sensor for 1000 bending-unbending  
 100 cycles under water.

---

## 101 Reference

- 102 1. X. Liao, Q. Liao, X. Yan, Q. Liang, H. Si, M. Li, H. Wu, S. Cao and Y. Zhang, *Advanced*  
103 *Functional Materials*, 2015, **25**, 2395-2401.
- 104 2. Y. Wei, S. Chen, F. Li, Y. Lin, Y. Zhang and L. Liu, *Acs Applied Materials & Interfaces*, 2015,  
105 **7**, 14182-14191.
- 106 3. X. Q. Liao, Z. Zhang, Q. L. Liao, Q. J. Liang, Y. Ou, M. X. Xu, M. H. Li, G. J. Zhang and Y.  
107 Zhang, *Nanoscale*, 2016, **8**, 13025-13032.
- 108 4. H. Liu, H. Jiang, F. Du, D. Zhang, Z. Li and H. Zhou, *Acs Sustainable Chemistry & Engineering*,  
109 **2017**, **5**, 10538-10543.
- 110 5. B. Saha, S. Baek and J. Lee, *Acs Applied Materials & Interfaces*, 2017, **9**, 4658-4666.
- 111 6. H. Song, J. Zhang, D. Chen, K. Wang, S. Niu, Z. Han and L. Ren, *Nanoscale*, 2017, **9**, 1166-  
112 1173.
- 113 7. H. Liu, H. Xiang, Y. Ma, Z. Li, Q. Meng, H. Jiang, H. Wu, P. Li, H. Zhou and W. Huang, *Acs*  
114 *Sustainable Chemistry & Engineering*, 2018, **6**, 15749-15755.
- 115 8. D.-J. Lee and D. Y. Kim, *Ieee Access*, 2019, **7**, 77200-77207.
- 116 9. H. Liu, H. Xiang, Y. Wang, Z. Li, L. Qian, P. Li, Y. Ma, H. Zhou and W. Huang, *Acs Applied*  
117 *Materials & Interfaces*, 2019, **11**, 40613-40619.
- 118 10. W. Chen, Z. Wang, Q. Li, X. Jin, H. Liu and H. Zhou, *Acs Applied Electronic Materials*, 2020,  
119 **2**, 247-253.
- 120 11. Y. Long, P. He, R. Xu, T. Hayasaka, Z. Shao, J. Zhong and L. Lin, *Carbon*, 2020, **157**, 594-601.
- 121 12. X. Qi, X. Li, H. Jo, K. S. Bhat, S. Kim, J. An, J.-W. Kang and S. Lim, *Sensors and Actuators a-*  
122 *Physical*, 2020, **301**.
- 123 13. R. Yin, S. Yang, Q. Li, S. Zhang, H. Liu, J. Han, C. Liu and C. Shen, *Science Bulletin*, 2020, **65**,  
124 899-908.
- 125 14. S. Veeralingam, P. Sahatiya and S. Badhulika, *Ieee Sensors Journal*, 2021, **21**, 8943-8949.
- 126 15. Q. Li, H. Liu, S. Zhang, D. Zhang, X. Liu, Y. He, L. Mi, J. Zhang, C. Liu, C. Shen and Z. Guo,  
127 *Acs Applied Materials & Interfaces*, 2019, **11**, 21904-21914.
- 128 16. L. Liu, Z. Jiao, J. Zhang, Y. Wang, C. Zhang, X. Meng, X. Jiang, S. Niu, Z. Han and L. Ren, *Acs*  
129 *Applied Materials & Interfaces*, 2021, **13**, 1967-1978.
- 130 17. Z. Duan, Y. Jiang, Q. Huang, Q. Zhao, Z. Yuan, Y. Zhang, S. Wang, B. Liu and H. Tai, *Journal*  
131 *of Materials Chemistry C*, 2021, **9**, 14003-14011.
- 132
